# Supplementary material for: Establishing a set of research priorities in care homes for older people in the UK: a modified Delphi consensus study with care home staff
Source: Oxford University Press journal article supplement (doi:10.1093/ageing/afw204), 2016-11-02

## Appendices

### Appendix 1 - Round 1 responses by theme

| Number for review of existing evidence by theme<br><i>(research question ID)</i> | Number of responses reviewed | Number of responses sufficient evidence/no justification for prioritisation in Round 2 | Number of questions shortlisted for prioritisation in Round 2 |
|----------------------------------------------------------------------------------|------------------------------|----------------------------------------------------------------------------------------|---------------------------------------------------------------|
| Behaviour ( <i>beh</i> )                                                         | 25                           | 10                                                                                     | 15                                                            |
| Nutrition / Hydration ( <i>nutr</i> )                                            | 12                           | 5                                                                                      | 7                                                             |
| Medication ( <i>med</i> )                                                        | 12                           | 6                                                                                      | 6                                                             |
| Staffing / Dependency ( <i>staff</i> )                                           | 12                           | 4                                                                                      | 8                                                             |
| Service delivery ( <i>service</i> )                                              | 8                            | 2                                                                                      | 6                                                             |
| Relationships ( <i>rel</i> )                                                     | 8                            | 4                                                                                      | 4                                                             |
| Activities ( <i>activity</i> )                                                   | 7                            | 4                                                                                      | 3                                                             |
| Access to services ( <i>access</i> )                                             | 7                            | 2                                                                                      | 5                                                             |
| Pressure areas ( <i>pressure</i> )                                               | 5                            | 0                                                                                      | 5                                                             |
| Person centred care ( <i>person</i> )                                            | 5                            | 2                                                                                      | 3                                                             |
| Mobility ( <i>mobile</i> )                                                       | 4                            | 2                                                                                      | 2                                                             |
| Urinary ( <i>urinary</i> )                                                       | 3                            | 0                                                                                      | 3                                                             |
| End of life care ( <i>end</i> )                                                  | 3                            | 0                                                                                      | 3                                                             |
| Environment ( <i>env</i> )                                                       | 3                            | 2                                                                                      | 1                                                             |
| Community ( <i>comm</i> )                                                        | 3                            | 0                                                                                      | 3                                                             |

|                           |            |           |           |
|---------------------------|------------|-----------|-----------|
| Oral care ( <i>oral</i> ) | 2          | 0         | 2         |
| Eye care ( <i>eye</i> )   | 1          | 1         | 0         |
| Infection ( <i>inf</i> )  | 1          | 1         | 0         |
| <b>Total</b>              | <b>121</b> | <b>45</b> | <b>76</b> |

## Appendix 2 – Long list of identified research topics

| <b>Medication</b>                                                                                                                                                            |
|------------------------------------------------------------------------------------------------------------------------------------------------------------------------------|
| 1. Can medication for agitation and aggression be effectively and cost effectively given in patch form?                                                                      |
| 2. Is giving medicines covertly to residents in care homes acceptable?                                                                                                       |
| 3. Are there more time-efficient methods of conducting nurse medication rounds in care homes without compromising patient safety?                                            |
| 4. What are the cost benefits of prescribing liquids or other formulations of medicines for older people living in care homes in terms of medication adherence and outcomes? |
| 5. What is the impact on the individual and other care home residents of a reduction of psychotropic medication for psychosis/challenging behaviour?                         |
| 6. Is there equity in drugs prescribing for Parkinson's disease within care homes?                                                                                           |
| <b>Staffing and dependency</b>                                                                                                                                               |
| 1. What are the essential elements required when training carers working with older people in care homes?                                                                    |
| 2. How can recruitment of carers with essential qualities such as compassion and empathy be improved by care homes?                                                          |
| 3. Can retention of care home staff be improved by greater decision-making involvement in the management of care homes?                                                      |
| 4. What are the attitudes of inexperienced care home staff towards providing person-centred care, and                                                                        |

|                                                                                                                                                                              |
|------------------------------------------------------------------------------------------------------------------------------------------------------------------------------|
| can training and support improve awareness of the need for person-centred care?                                                                                              |
| 5. What are appropriate staffing levels in relation to the number of residents in care homes and their relative care needs?                                                  |
| 6. How can care home staff be trained and supported in 'whistle-blowing policies' to report inappropriate practices in care homes?                                           |
| 7. What strategies can be used to reduce overt and covert racism in interactions between residents and care home staff and between other healthcare professionals and staff? |
| 8. Can education strategies improve care home staff attitudes towards use of power and authority in their relationship with older people with cognitive impairments?         |
| <b>Person centred care</b>                                                                                                                                                   |
| 1. How can dignity be enhanced for residents in care home settings?                                                                                                          |
| 2. How can person-centred care be provided in care homes appropriate to the person's individualised needs?                                                                   |
| 3. How can best interest decisions made for care home residents with dementia be properly documented in care plans?                                                          |
| <b>Urinary</b>                                                                                                                                                               |
| 1. In care home residents, does the reduction of caffeine intake reduce levels of incontinence and use of incontinence aids?                                                 |
| 2. Can provision of quality person-centred care improve incontinence in care home residents?                                                                                 |
| 3. In care home residents, does the reduction of caffeine intake with or without an increase in fluid                                                                        |

|                                                                                                                           |
|---------------------------------------------------------------------------------------------------------------------------|
| intake reduce incidence of urinary tract infections?                                                                      |
| <b>Activities</b>                                                                                                         |
| 1. What activities can improve the quality of life for care home residents with impaired vision or hearing?               |
| 2. What aids/activities can improve the quality of life for care home residents with restricted physical abilities?       |
| 3. How can the provision of visual aids enhance the quality of life of people with end stage dementia?                    |
| <b>End of life care</b>                                                                                                   |
| 1. How can families and healthcare professionals contribute to improving end of life care for older people in care homes? |
| 2. How can early and appropriate discussion with older people in care home about end of life care be supported?           |
| 3. What is the level of staff knowledge and awareness of the legal implications of Advance Care Planning?                 |
| <b>Mobility</b>                                                                                                           |
| 1. How can mobility levels of older people moving into care homes be increased?                                           |
| 2. Is post-fracture community physiotherapy effective in improving outcomes for care home residents with dementia?        |
| <b>Pressure area care</b>                                                                                                 |
| 1. Are Waterlow scores accurate in assessing the risk of pressure ulcer development in older people living in care homes? |
| 2. What is the effectiveness and cost-effectiveness of strategies to reduce pressure ulcers in care home                  |

|                                                                                                                                                       |
|-------------------------------------------------------------------------------------------------------------------------------------------------------|
| residents?                                                                                                                                            |
| 3. Can provision of quality person-centred care prevent or reduce the incidence of pressure ulcers in care home residents?                            |
| 4. What is nurse assessors' knowledge of device use for the prevention and management of pressure ulcers in care homes?                               |
| 5. Does an education intervention for care home staff reduce the incidence of pressure ulcer development?                                             |
| <b>Service delivery</b>                                                                                                                               |
| 1. How can Incident Reporting in Care Homes be improved?                                                                                              |
| 2. Can standardised care planning tools be developed for care home residents throughout UK?                                                           |
| 3. Does the expectation and experience of care by residents in care homes correlate with CQC requirements and what is the impact on outcomes of care? |
| 4. Can electronic health records and point of care recording in care homes improve early warning of health issues?                                    |
| 5. How can communication and information sharing be improved between service providers to improve care and efficiency?                                |

|                                                                                                                                                                               |
|-------------------------------------------------------------------------------------------------------------------------------------------------------------------------------|
| 6. What can be learned from the US sub acute model (transition/intermediate care)? Can it enable UK care homes to improve participation in 'care closer to home' initiatives? |
| <b>Relationships</b>                                                                                                                                                          |

|                                                                                                                                                                               |
|-------------------------------------------------------------------------------------------------------------------------------------------------------------------------------|
| 1. How can family members of residents living in a care home with dementia be supported in the community?                                                                     |
| 2. How can the emotional needs be met of older people living in the community and in care homes?                                                                              |
| 3. What are the most effective strategies to involve primary carers of older people moving into care homes to maintain caring relationship?                                   |
| 4. What models of family involvement can improve resident outcomes in care homes?                                                                                             |
| <b>Oral care</b>                                                                                                                                                              |
| 1. What are the most effective methods of providing oral care for older people in care homes with particular oral care needs, such as dementia or requiring end of life care? |
| 2. What is the impact of levels of oral hygiene on the nutritional status of older people living in care homes?                                                               |
| <b>Community</b>                                                                                                                                                              |
| 1. How can there be greater integration between older people living in the community and care homes?                                                                          |
| 2. How can we best encourage care home residents to participate and engage in community resources?                                                                            |
| 3. What is the public and media perception of care homes compared with other care settings, and what is the impact on care home staff attitudes?                              |
| <b>Environment</b>                                                                                                                                                            |
| 1. How can care homes be made to feel more like a home?                                                                                                                       |
| <b>Nutrition and hydration</b>                                                                                                                                                |
| 1. In older people living in care homes, does the use of MUST accurately assess nutritional status in                                                                         |

|                                                                                                                                                                                  |
|----------------------------------------------------------------------------------------------------------------------------------------------------------------------------------|
| comparison with other nutritional screening tools?                                                                                                                               |
| 2. What is the effect of altering main meal timings on preventing weight loss in residents in care homes?                                                                        |
| 3. How can long term PEG feeding be best managed and nutritional needs met for care home residents?                                                                              |
| 4. What are the advantages and disadvantages of closing care homes to visitors (including medical staff) during meal times?                                                      |
| 5. How can the nutritional needs of older people in care homes with dysphagia be best supported?                                                                                 |
| 6. What is the impact of environmental factors on dietary intake/nutritional status of care home residents with dementia?                                                        |
| 7. How can care home staff be supported to respect residents and their families' wishes which conflict with specialist advice regarding best care, such as refusing a soft diet? |
| <b>Behaviour</b>                                                                                                                                                                 |
| 1. What interventions are effective to reduce anxiety in care home residents?                                                                                                    |
| 2. Can a pain management assessment tool be effective amongst dementia patients in care home settings?                                                                           |
| 3. How can de-escalation techniques be used to minimise agitation in care home residents?                                                                                        |
| 4. What are the most effective strategies to improve depression in care home residents with dementia?                                                                            |
| 5. What strategies reduce levels of violence by residents towards staff in care homes?                                                                                           |
| 6. In care home residents with dementia, does a reduction of caffeine intake reduce levels of agitation?                                                                         |
| 7. Can the use of herbal drinks, such as valerian root tea, reduce 'sundown syndrome' in older people in                                                                         |



|                                                                                                                                                                  |
|------------------------------------------------------------------------------------------------------------------------------------------------------------------|
| care homes?                                                                                                                                                      |
| 8. Comparison of effectiveness of non-drug related therapies by demographic characteristics of care home residents with dementia                                 |
| 9. What are the most effective strategies to improve integration and socialisation of older people following admission in care homes?                            |
| 10. What are the most effective strategies to enhance communication with people in care homes with advanced dementia and other communication problems?           |
| 11. How can families of people with dementia be better informed about dementia and the experience of living with dementia?                                       |
| 12. How can older people with end stage dementia be supported to retain their individuality?                                                                     |
| 13. How can families be helped to cope with aggressive behaviour in care home residents?                                                                         |
| 14. What environmental factors influence levels of agitation in care home residents?                                                                             |
| 15. What strategies can families and healthcare professionals use to best manage challenging behaviour in care home residents in addition to drug therapy?       |
| <b>Access to services</b>                                                                                                                                        |
| 1. What is the effect of the level of access to mental health services on the use of anti-psychotic medication in care homes?                                    |
| 2. What is the best model of provision of dental services for care home residents?                                                                               |
| 3. What is the effectiveness and cost effectiveness of nursing services such as wound care being provided by nurses in care homes as opposed to district nurses? |

4. What is the best model of access to mental health services in an appropriate timescale for care home residents?

5. What are the advantages and disadvantages of joint care home provision for both frail elderly and adults with learning disabilities?

### Appendix 3 - Round 2 responses

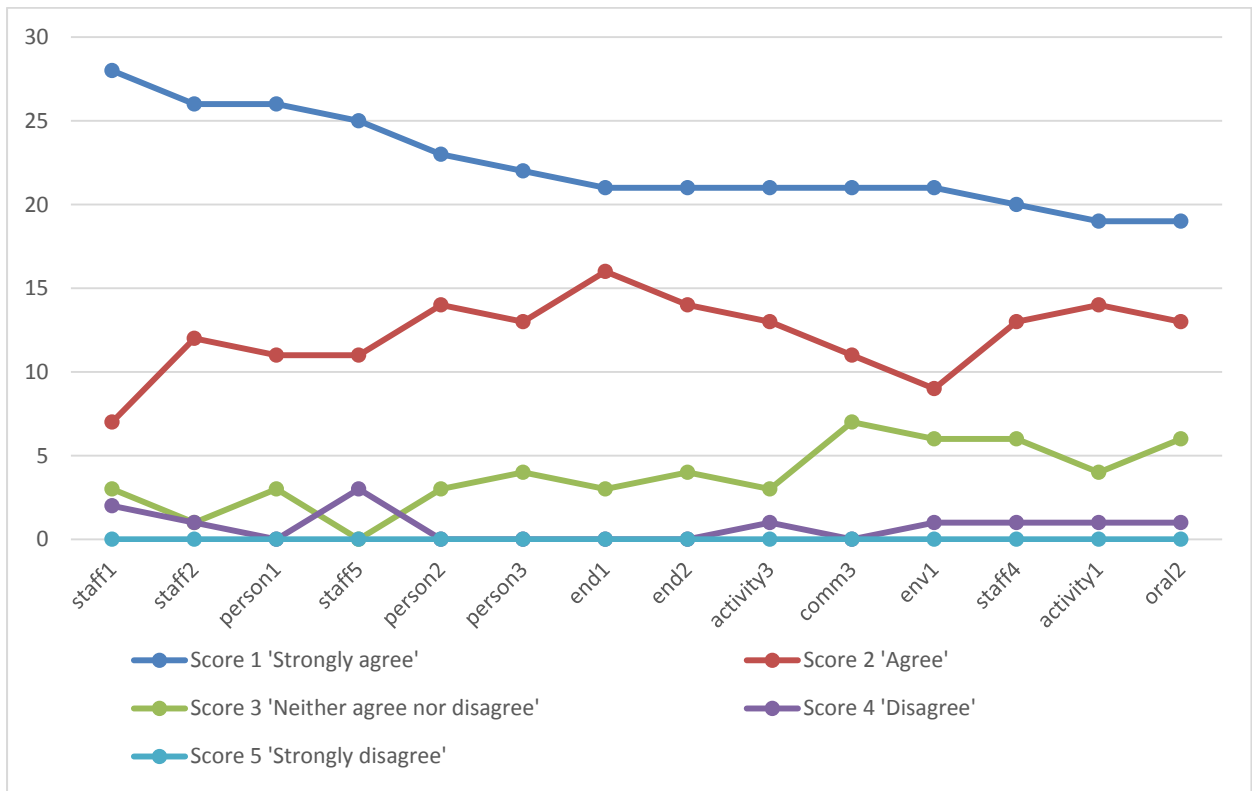

#### Appendix 4 – Round 2 Interim rank order of top 30 research questions

| Rank | RQ ID   | Research Question                                                                                                        | "This topic is very important to me" |                    |                                         |                       |                                |
|------|---------|--------------------------------------------------------------------------------------------------------------------------|--------------------------------------|--------------------|-----------------------------------------|-----------------------|--------------------------------|
|      |         |                                                                                                                          | Score 1<br>'Strongly agree'          | Score 2<br>'Agree' | Score 3<br>'Neither agree nor disagree' | Score 4<br>'Disagree' | Score 5<br>'Strongly disagree' |
| 1    | staff1  | What are the essential elements required when training carers working with older people in care homes?                   | 28                                   | 7                  | 3                                       | 2                     | 0                              |
| 2    | staff2  | How can recruitment of carers with essential qualities such as compassion and empathy be improved by care homes?         | 26                                   | 12                 | 1                                       | 1                     | 0                              |
| 3    | person1 | How can dignity be enhanced for residents in care home settings?                                                         | 26                                   | 11                 | 3                                       | 0                     | 0                              |
| 4    | staff5  | What are appropriate staffing levels in relation to the number of residents in care homes and their relative care needs? | 25                                   | 11                 | 0                                       | 3                     | 0                              |
| 5    | person2 | How can person-centred care be provided in care homes appropriate to the person's individualised needs?                  | 23                                   | 14                 | 3                                       | 0                     | 0                              |
| 6    | person3 | How can best interest decisions made for care home residents with dementia be properly                                   | 22                                   | 13                 | 4                                       | 0                     | 0                              |

|    |           |                                                                                                                                                                                    |    |    |   |   |   |
|----|-----------|------------------------------------------------------------------------------------------------------------------------------------------------------------------------------------|----|----|---|---|---|
|    |           | documented in care plans?                                                                                                                                                          |    |    |   |   |   |
| 7  | end1      | How can families and healthcare professionals contribute to improving end of life care for older people in care homes?                                                             | 21 | 16 | 3 | 0 | 0 |
| 8  | end2      | How can early and appropriate discussion with older people in care home about end of life care be supported?                                                                       | 21 | 14 | 4 | 0 | 0 |
| 9  | activity3 | How can the provision of visual aids enhance the quality of life of people with end stage dementia?                                                                                | 21 | 13 | 3 | 1 | 0 |
| 10 | comm3     | What is the public and media perception of care homes compared with other care settings, and what is the impact on care home staff attitudes?                                      | 21 | 11 | 7 | 0 | 0 |
| 11 | env1      | How can care homes be made to feel more like a home?                                                                                                                               | 21 | 9  | 6 | 1 | 0 |
| 12 | staff4    | What are the attitudes of inexperienced care home staff towards providing person-centred care, and can training and support improve awareness of the need for person-centred care? | 20 | 13 | 6 | 1 | 0 |

|    |           |                                                                                                                                                                   |    |    |   |   |   |
|----|-----------|-------------------------------------------------------------------------------------------------------------------------------------------------------------------|----|----|---|---|---|
| 13 | activity1 | What activities can improve the quality of life for care home residents with impaired vision or hearing?                                                          | 19 | 14 | 4 | 1 | 0 |
| 14 | oral2     | What is the impact of levels of oral hygiene on the nutritional status of older people living in care homes?                                                      | 19 | 13 | 6 | 1 | 0 |
| 15 | staff8    | Can education strategies improve care home staff attitudes towards use of power and authority in their relationship with older people with cognitive impairments? | 19 | 11 | 9 | 0 | 0 |
| 16 | beh1      | What interventions are effective to reduce anxiety in care home residents?                                                                                        | 18 | 18 | 2 | 0 | 0 |
| 17 | beh4      | What are the most effective strategies to improve depression in care home residents with dementia?                                                                | 18 | 17 | 3 | 0 | 0 |
| 18 | staff3    | Can retention of care home staff be improved by greater decision-making involvement in the management of care homes?                                              | 18 | 15 | 6 | 1 | 0 |
| 19 | oral1     | What is the impact of levels of oral hygiene on the nutritional status of older people living in                                                                  | 18 | 14 | 7 | 1 | 0 |

|    |         |                                                                                                                                                        |    |    |   |   |   |
|----|---------|--------------------------------------------------------------------------------------------------------------------------------------------------------|----|----|---|---|---|
|    |         | care homes?                                                                                                                                            |    |    |   |   |   |
| 20 | beh12   | How can older people with end stage dementia be supported to retain their individuality?                                                               | 18 | 13 | 6 | 0 | 0 |
| 21 | beh11   | How can families of people with dementia be better informed about dementia and the experience of living with dementia?                                 | 18 | 12 | 7 | 1 | 0 |
| 22 | beh15   | What strategies can families and healthcare professionals use to best manage challenging behaviour in care home residents in addition to drug therapy? | 17 | 17 | 4 | 0 | 0 |
| 23 | beh3    | How can de-escalation techniques be used to minimise agitation in care home residents?                                                                 | 17 | 16 | 5 | 0 | 0 |
| 24 | beh5    | What strategies reduce levels of violence by residents towards staff in care homes?                                                                    | 17 | 14 | 7 | 0 | 0 |
| 25 | mobile1 | How can mobility levels of older people moving into care homes be increased?                                                                           | 17 | 13 | 8 | 2 | 0 |
| 26 | staff6  | How can care home staff be trained and supported in 'whistle-blowing policies' to report inappropriate practices in care                               | 17 | 12 | 9 | 1 | 0 |

|    |               |                                                                                                                                                                               |    |    |    |   |   |
|----|---------------|-------------------------------------------------------------------------------------------------------------------------------------------------------------------------------|----|----|----|---|---|
|    |               | homes?                                                                                                                                                                        |    |    |    |   |   |
| 27 | pressure<br>5 | Does an education intervention for care home staff reduce the incidence of pressure ulcer development?                                                                        | 17 | 11 | 10 | 0 | 1 |
| 28 | nutr6         | What is the impact of environmental factors on dietary intake/nutritional status of care home residents with dementia?                                                        | 16 | 16 | 6  | 0 | 0 |
| 29 | pressure<br>3 | Can provision of quality person-centred care prevent or reduce the incidence of pressure ulcers in care home residents?                                                       | 16 | 15 | 8  | 0 | 0 |
| 30 | nutri7        | How can care home staff be supported to respect residents and their families' wishes which conflict with specialist advice regarding best care, such as refusing a soft diet? | 15 | 18 | 7  | 0 | 0 |



### Appendix 5 - Results of Total Scores in Round 3

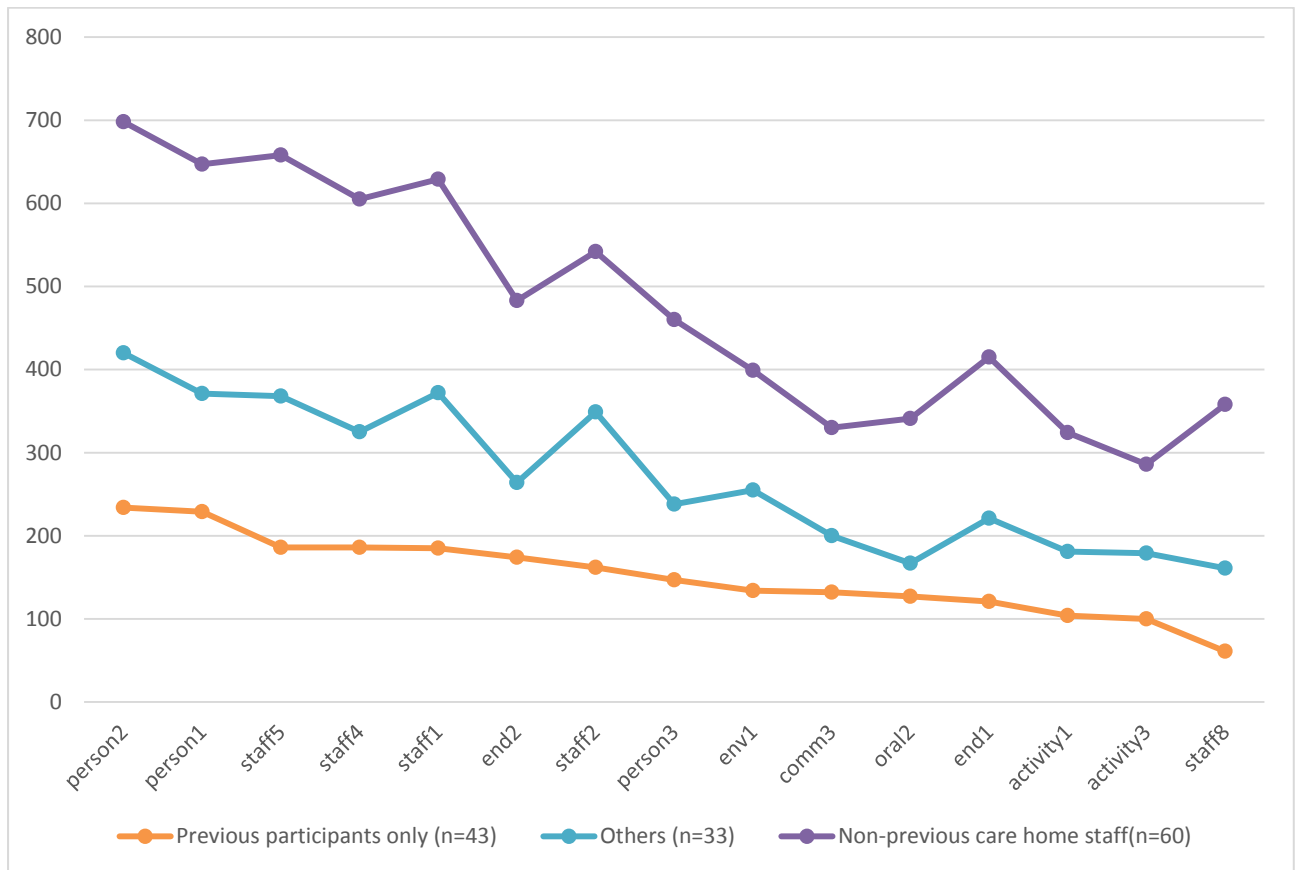

Supplement: aa-16-0149-File001.pdf [file aa-16-0149-File001.pdf]
